# Supplementary material for: Multimodal therapies: glucose oxidase-triggered tumor starvation-induced synergism with enhanced chemodynamic therapy and chemotherapy
Source: Royal Society of Chemistry journal article supplement (doi:10.1039/c9nj05469c), 2019-12-18
Supplement: c9nj05469c1.pdf [file c9nj05469c1.pdf]

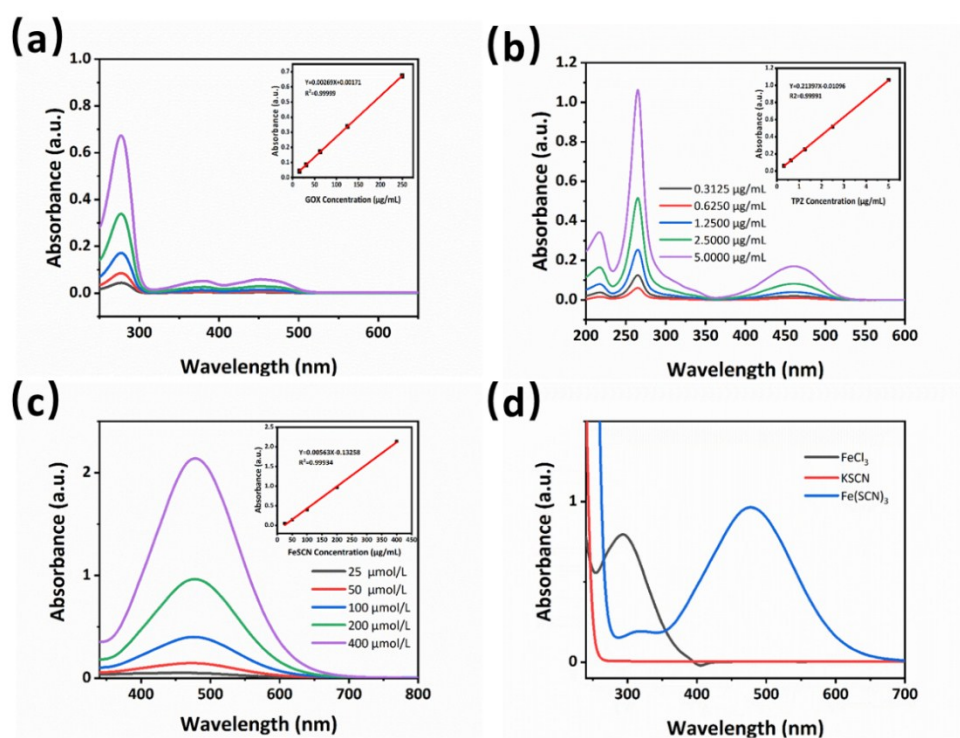

**Figure S1.** Ultraviolet absorption wavelength and related standard curves of (a) GOX, (b) TPZ, (c) Fe(SCN)<sub>3</sub>. (d) Specific ultraviolet absorption of FeCl<sub>3</sub>, KSCN and Fe(SCN)<sub>3</sub>.

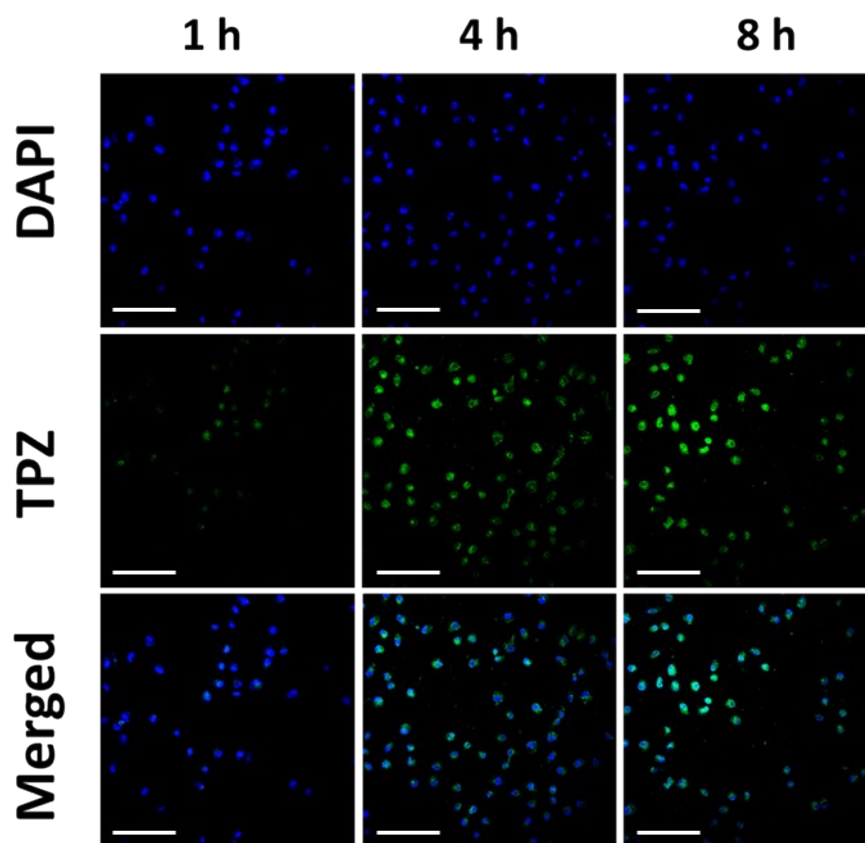

**Figure S2.** CLSM images of the MCF-7 cells incubated with TPZ/Fe<sub>3</sub>O<sub>4</sub>@MSN-GOX for 1h, 4h and 8h. The scale bar is 100  $\mu$ m.

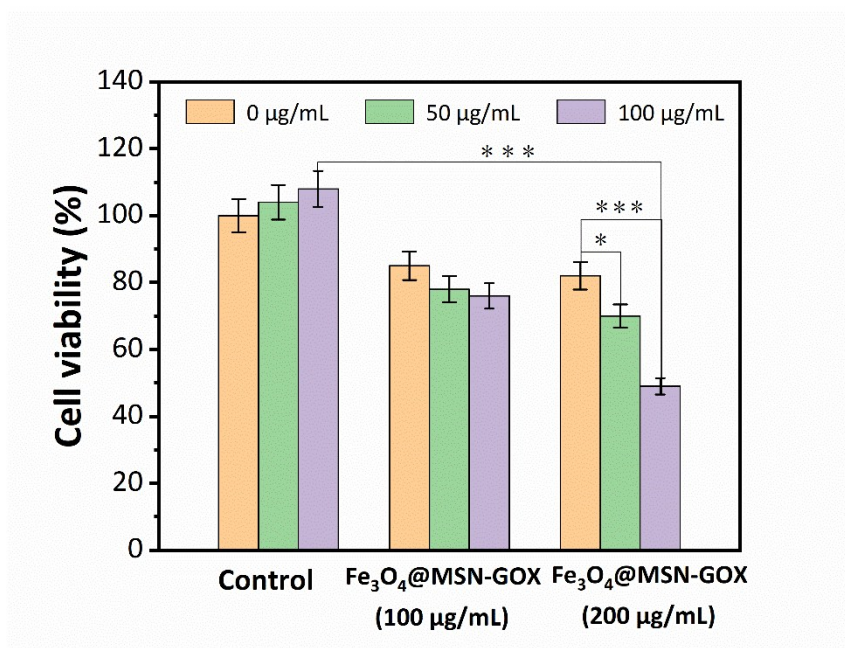

**Figure S3.** Viabilities of MCF-7 cells after 24 h of incubation with Fe<sub>3</sub>O<sub>4</sub>@MSN-GOX (100 or 200 µg/mL) in different glucose-containing DMEM media. \*P<0.05, \*\*\*P<0.001.

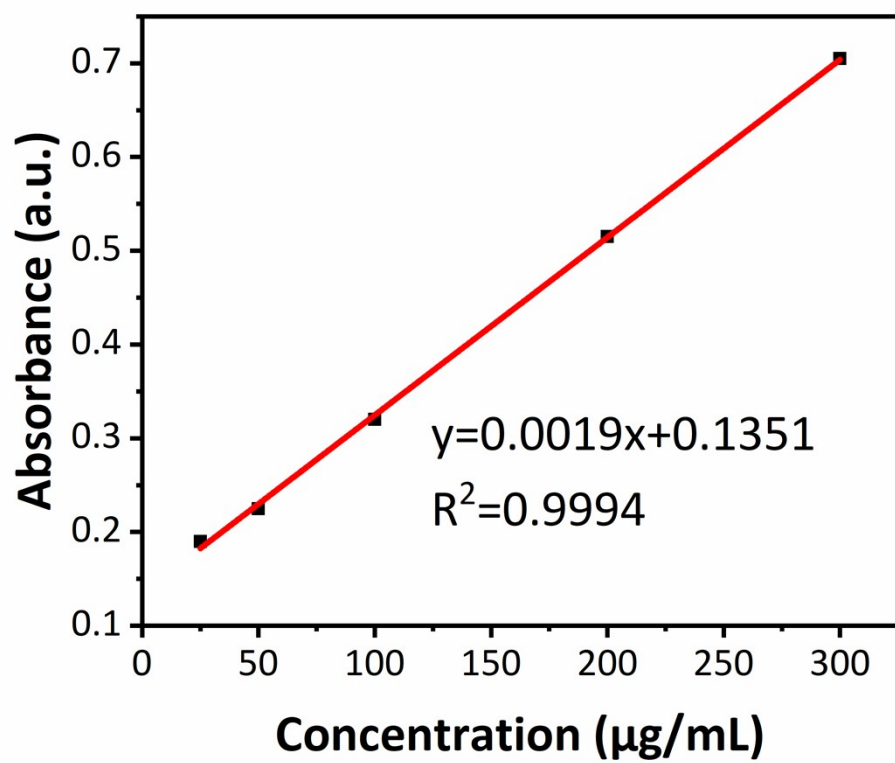

**Figure S4.** Linear relationships between GOX concentration and absorbance.
